# Supplementary material for: Transcriptional factor six2 promotes the competitive endogenous RNA network between CYP4Z1 and pseudogene CYP4Z2P responsible for maintaining the stemness of breast cancer cells
Source: Springer Nature journal article supplement (doi:10.1186/s13045-019-0697-6), 2019-03-04

**A** CYP4Z1

WT 1...CAGG-TAAT**TCAG**GTCTA-CCAG...2403

MUT CAGG-GCGGTGT**AGGACC**-CCAG

CYP4Z2P-1

WT 1...GCTC-**TCAGCT**-TGGA...2229

MUT GCTC-**CTGATG**-TGGA

CYP4Z2P-2

WT 1127...GAAG-**TCAGCT**-TGAG...2998

MUT GAAG-**CTGATG**-TGAG

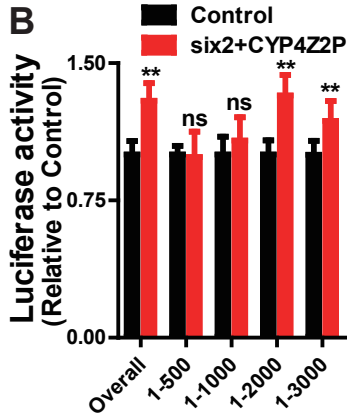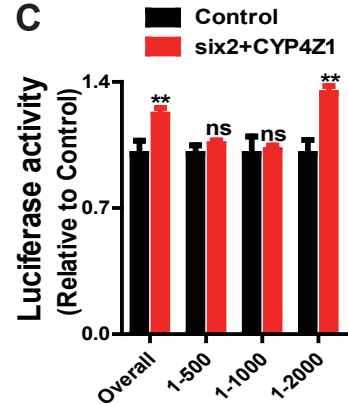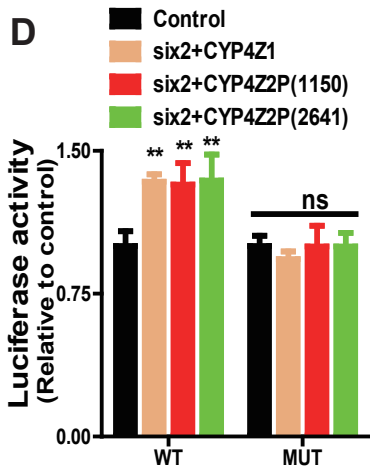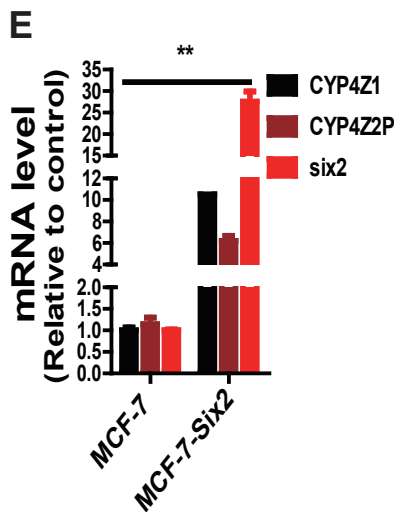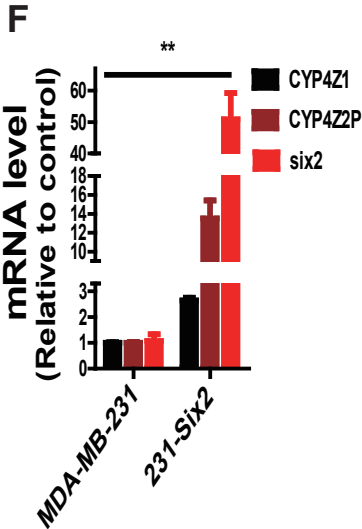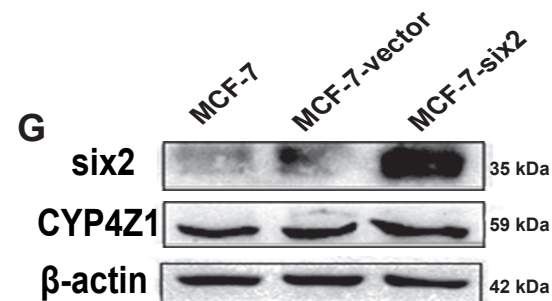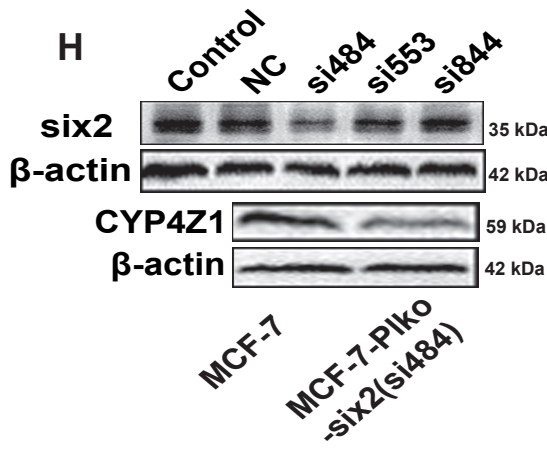

Supplement: MOESM9 [file 16524620]
