# Supplementary material for: Transcriptional factor six2 promotes the competitive endogenous RNA network between CYP4Z1 and pseudogene CYP4Z2P responsible for maintaining the stemness of breast cancer cells
Source: Springer Nature journal article supplement (doi:10.1186/s13045-019-0697-6), 2019-03-04

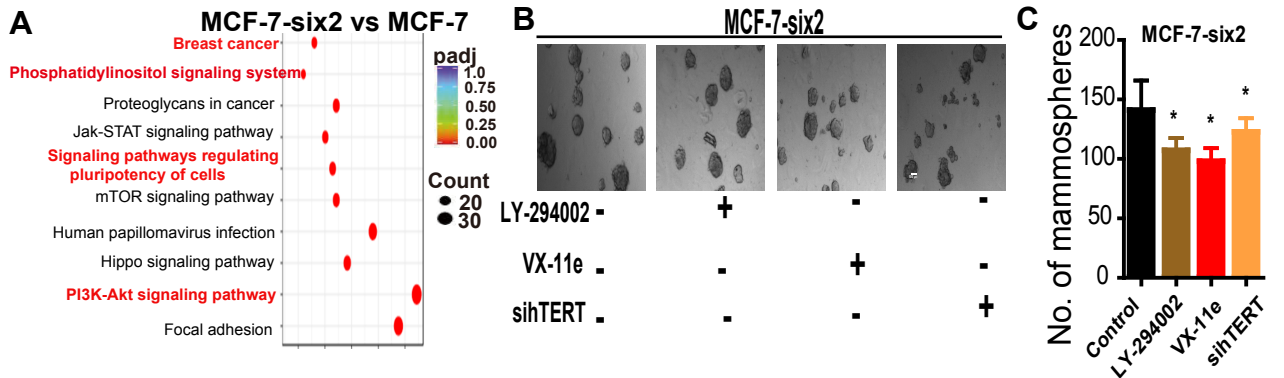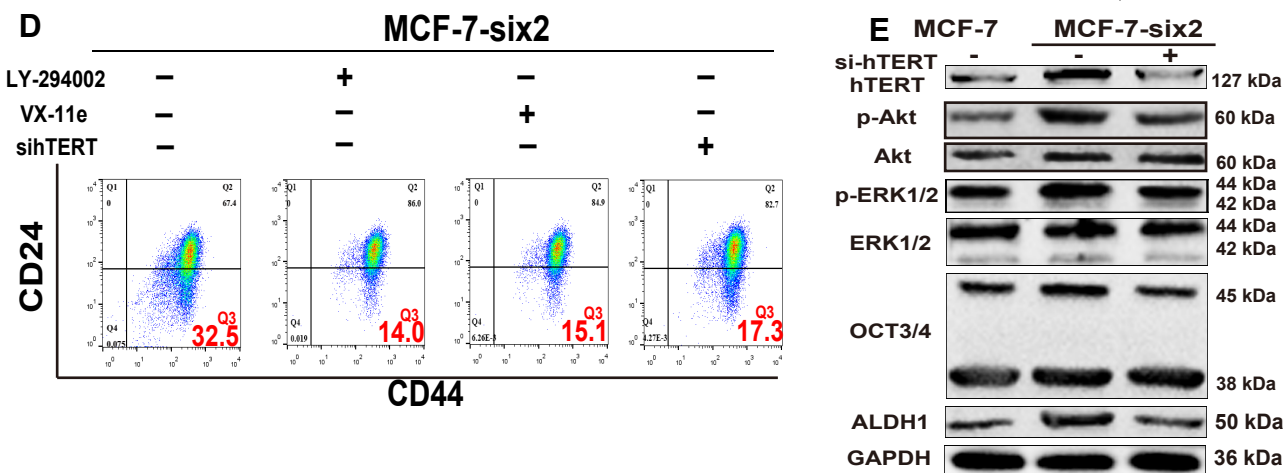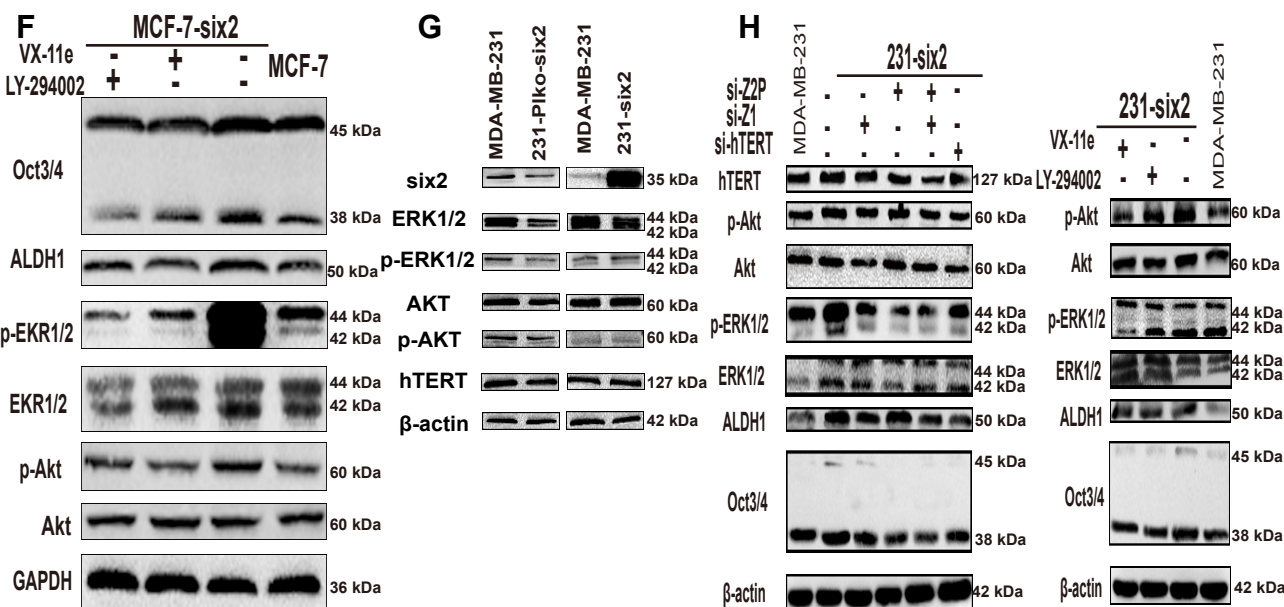

Supplement: MOESM12 [file 16524620]
